# Supplementary material
Source: Elsevier journal article supplement (https://www.sciencedirect.com/science/article/pii/S0300289620302568)
Supplement: mmc1 [file S0300289620302568:mmc1.docx]

**Supplementary material**

**PREOPERATIVE BODY WEIGHT AND ALBUMIN PRIOR TO THORACOTOMY PREDICT SURVIVAL IN PATIENTS WITH RESECTABLE LUNG NEOPLASMS: ROLE OF COPD**


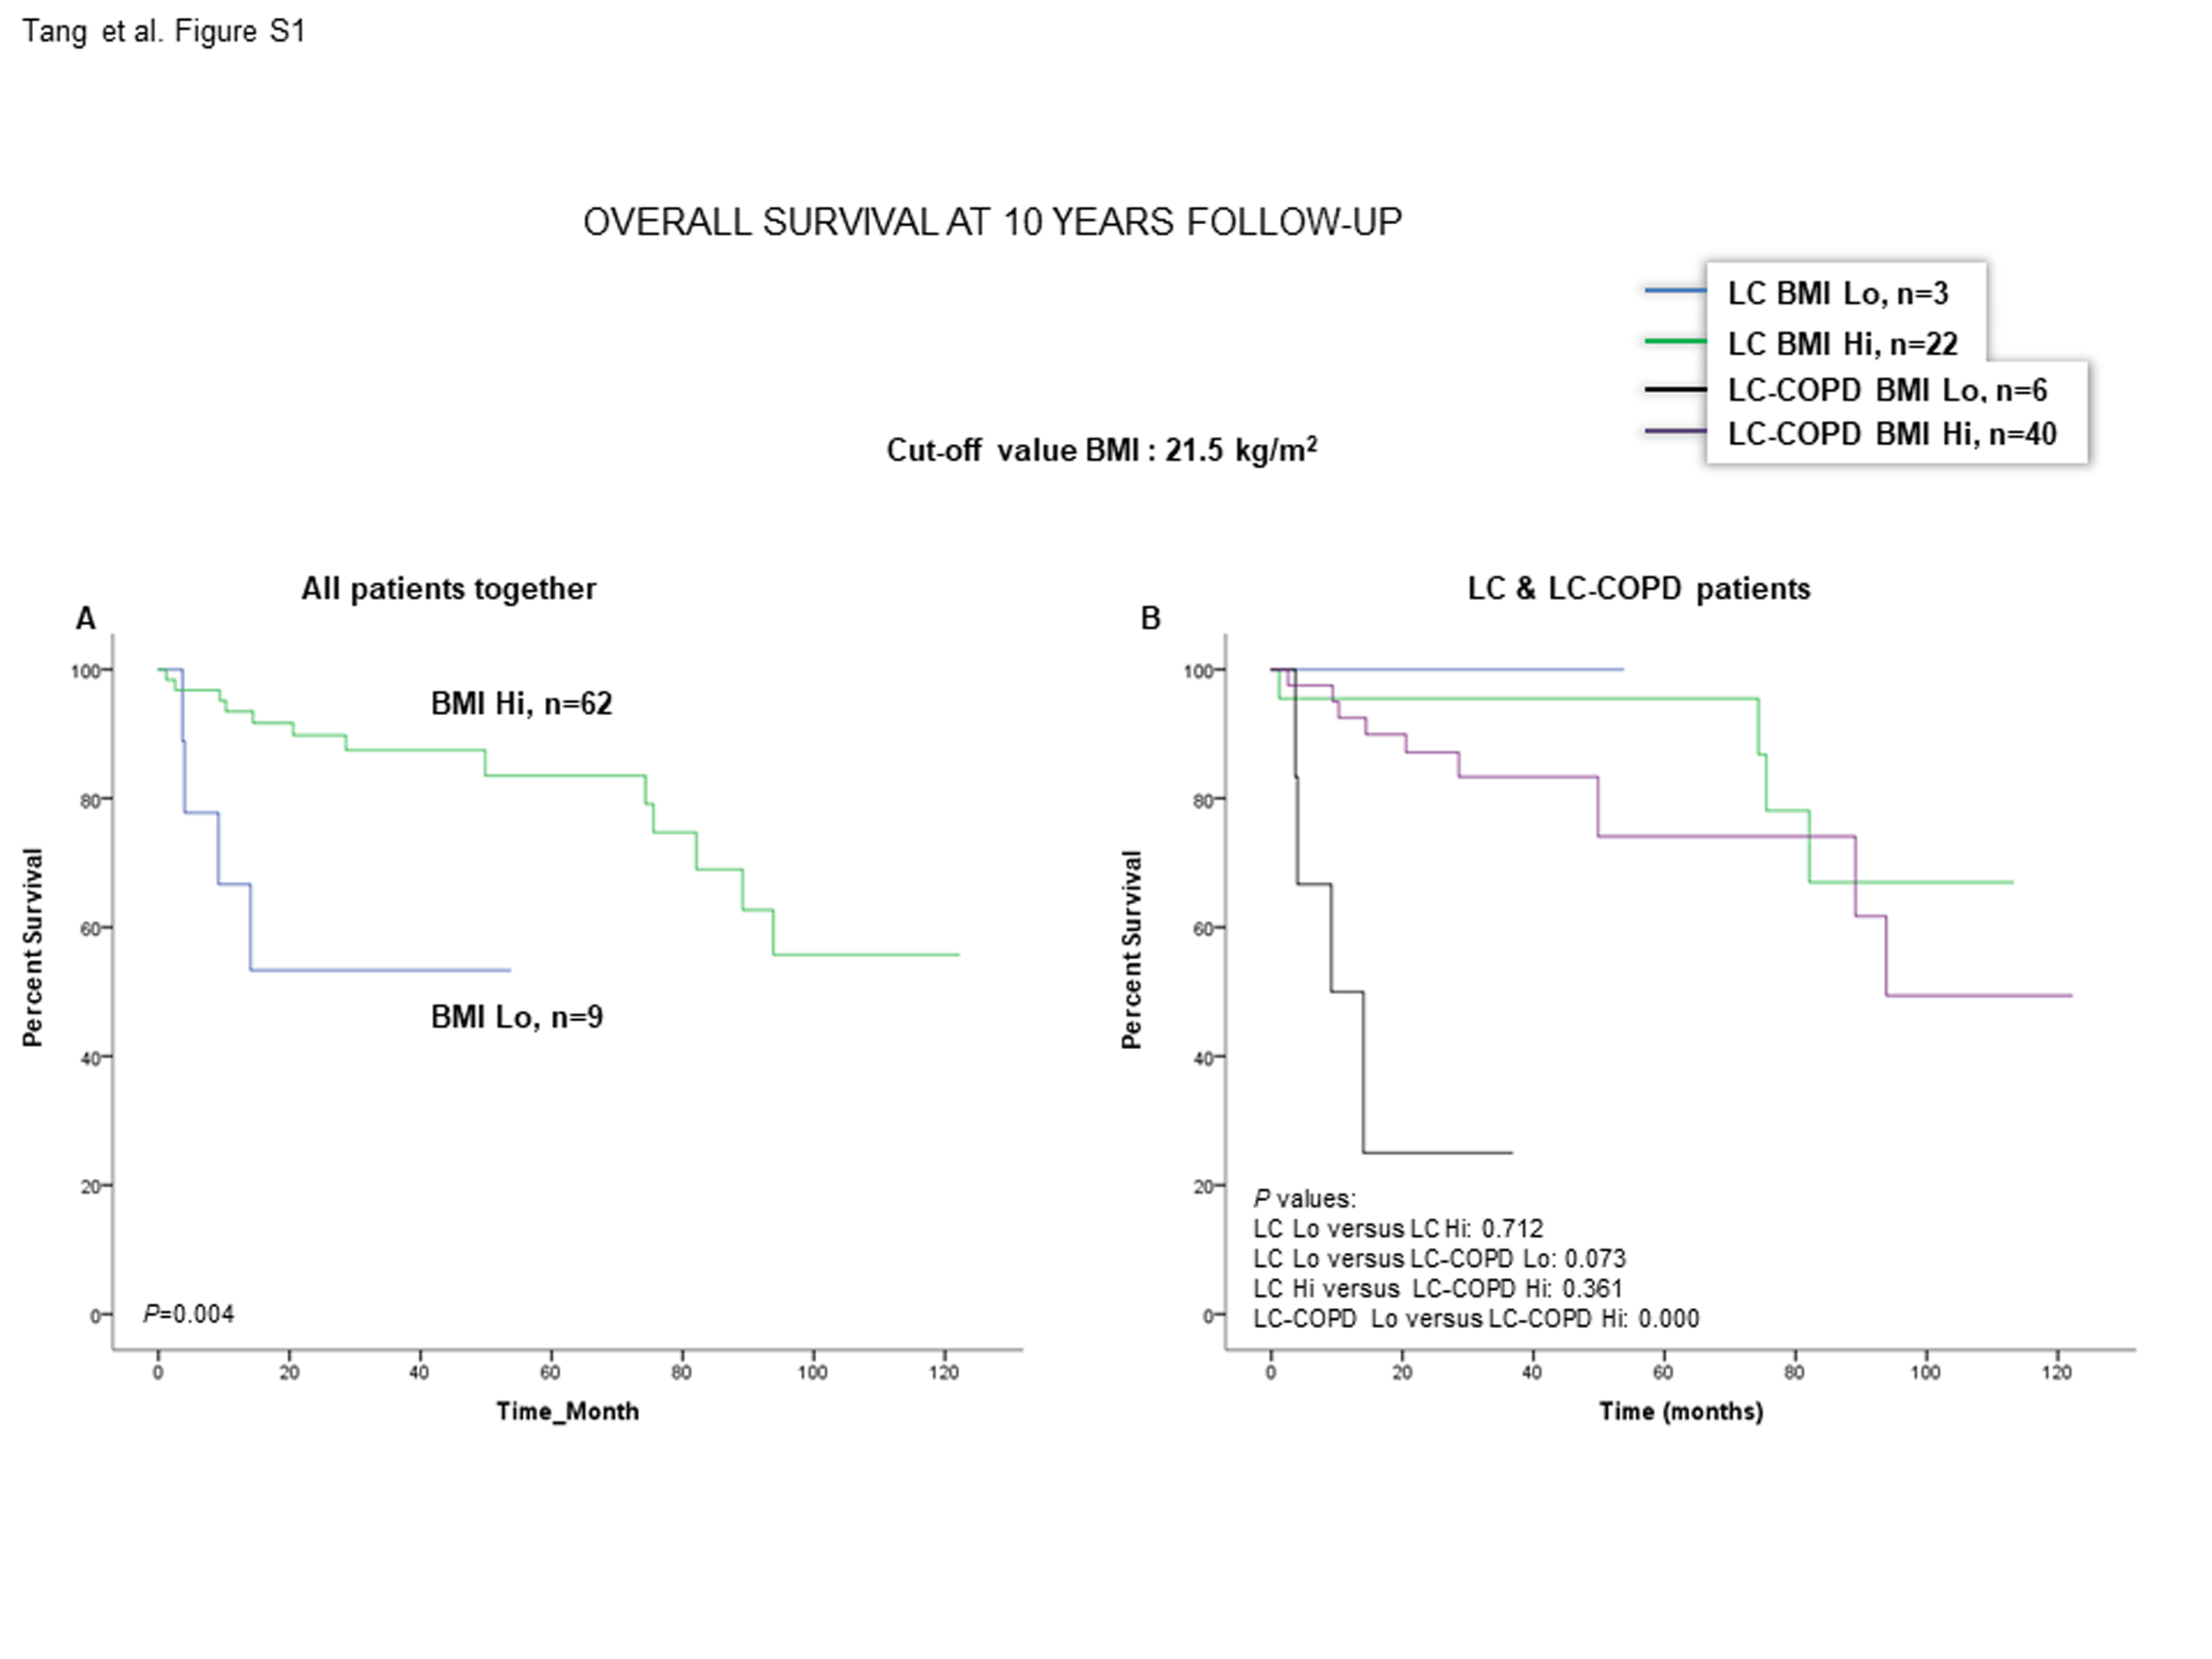

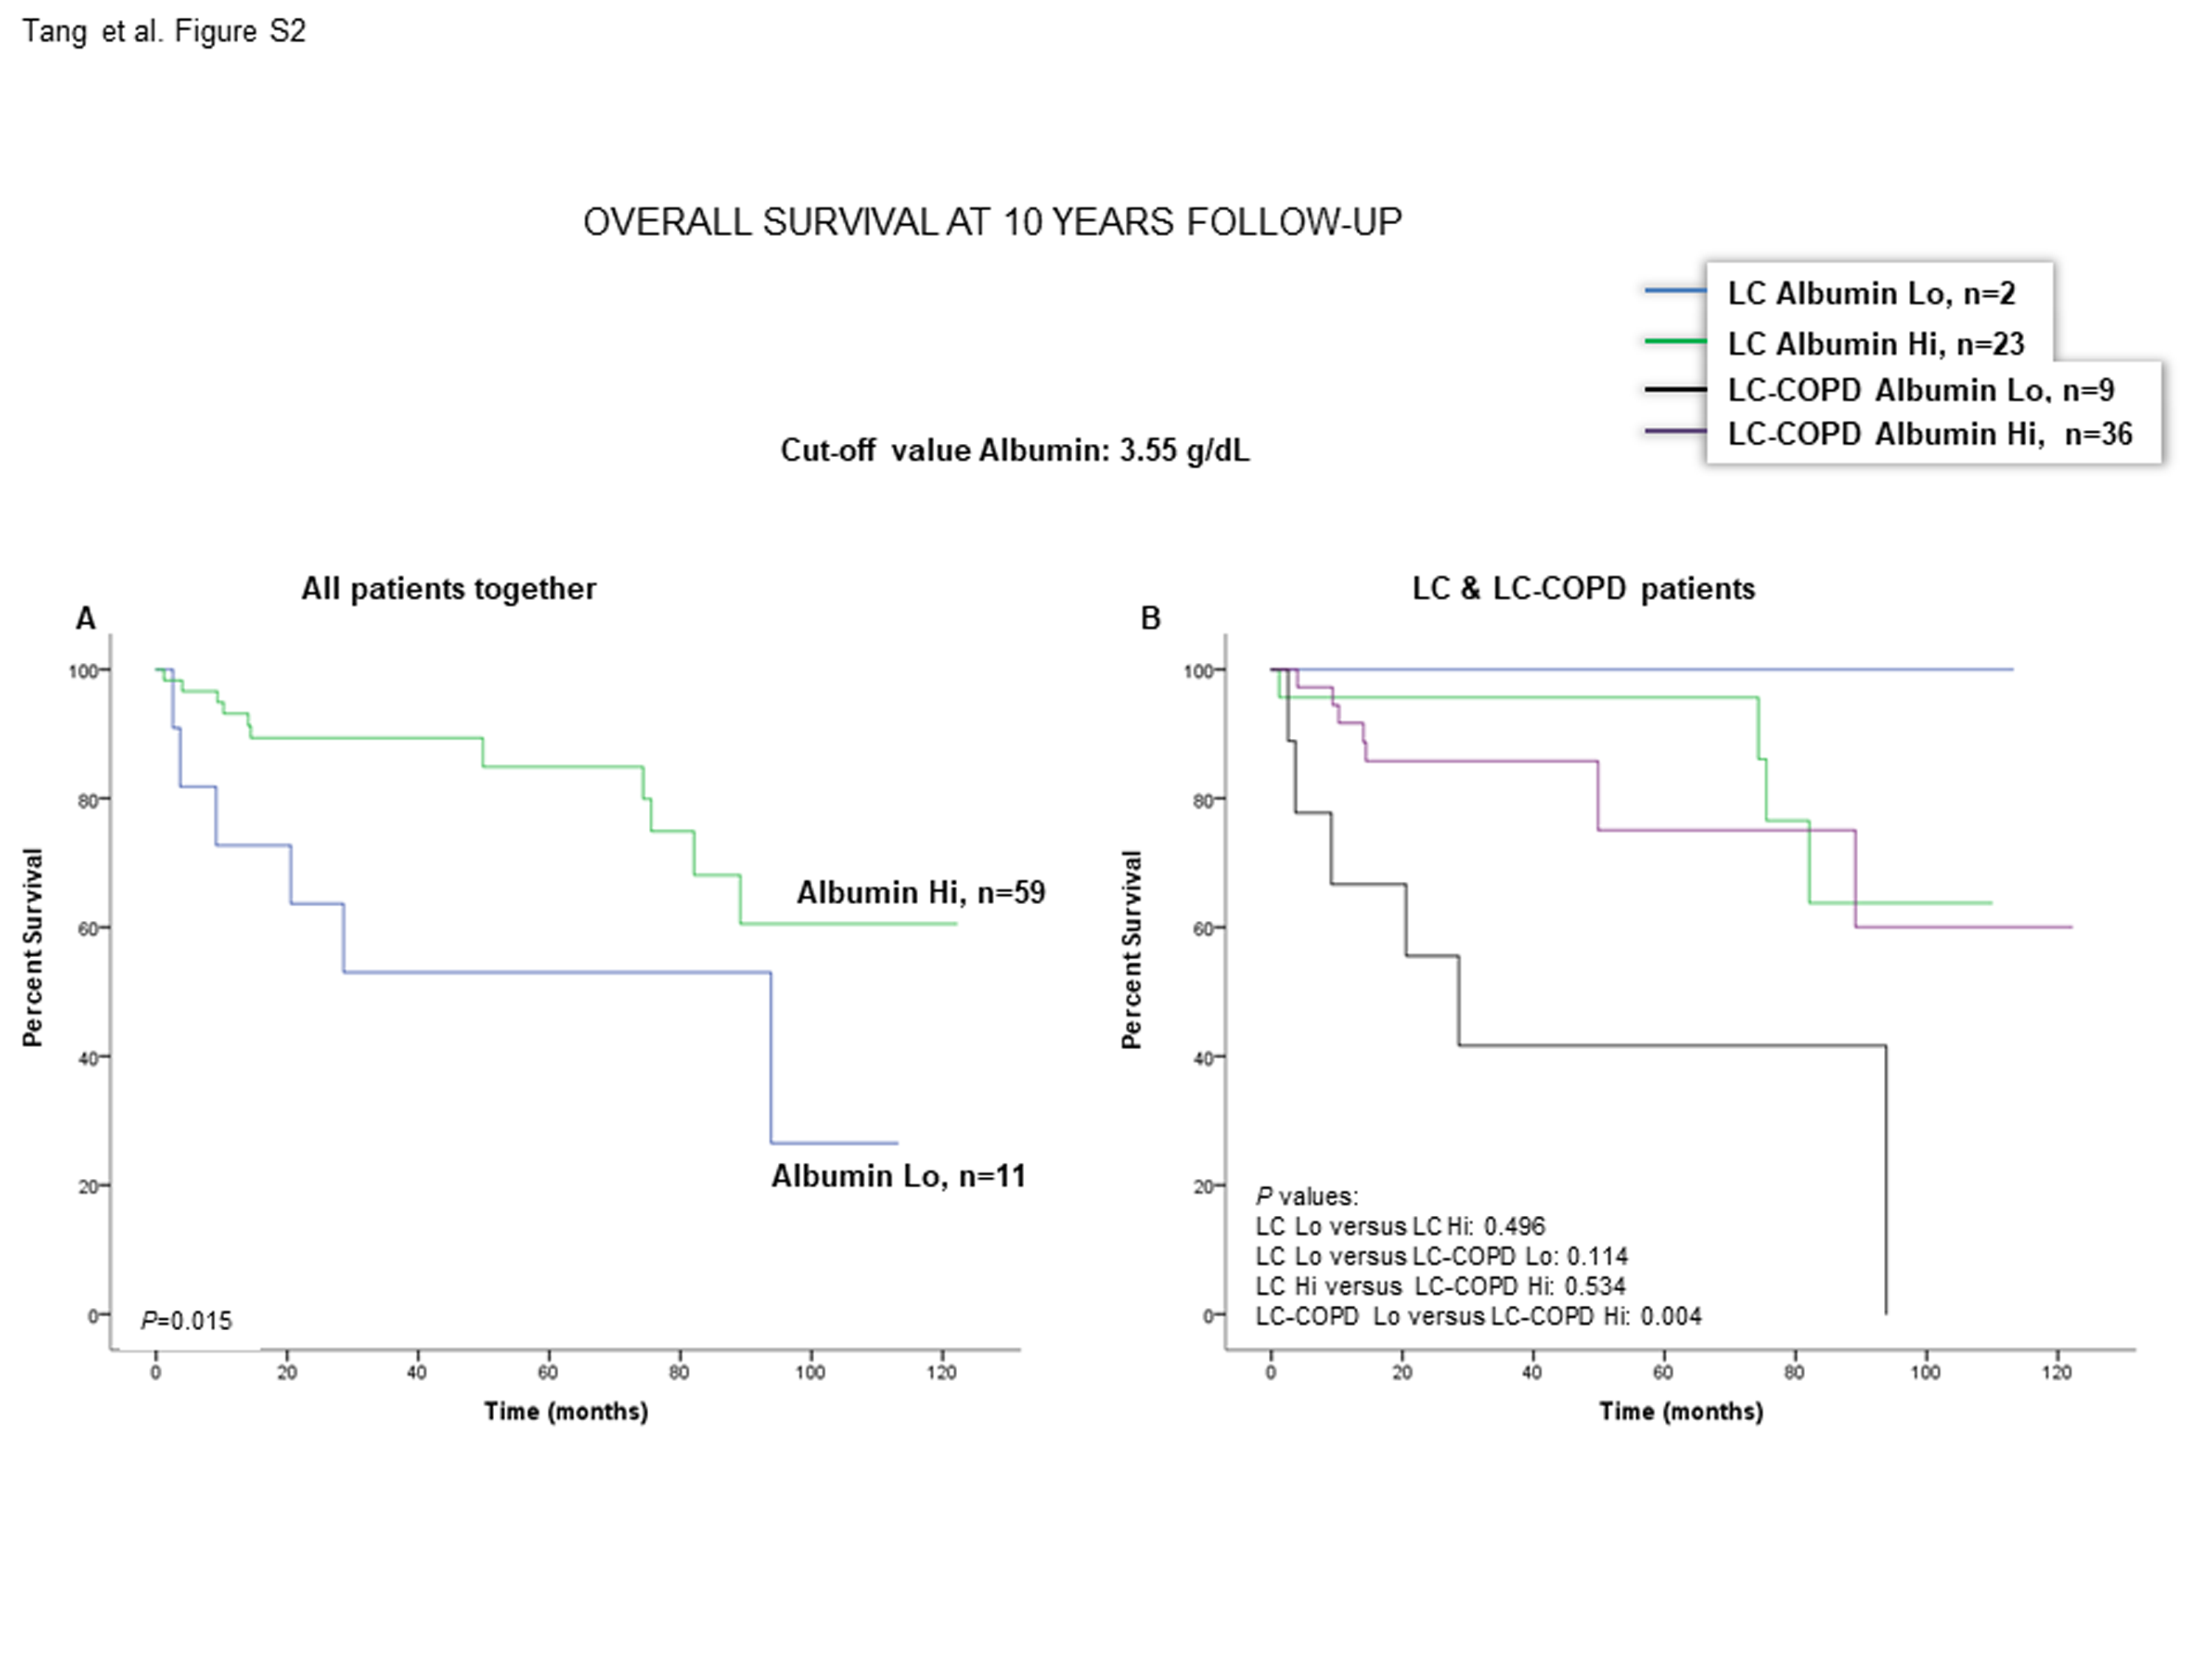

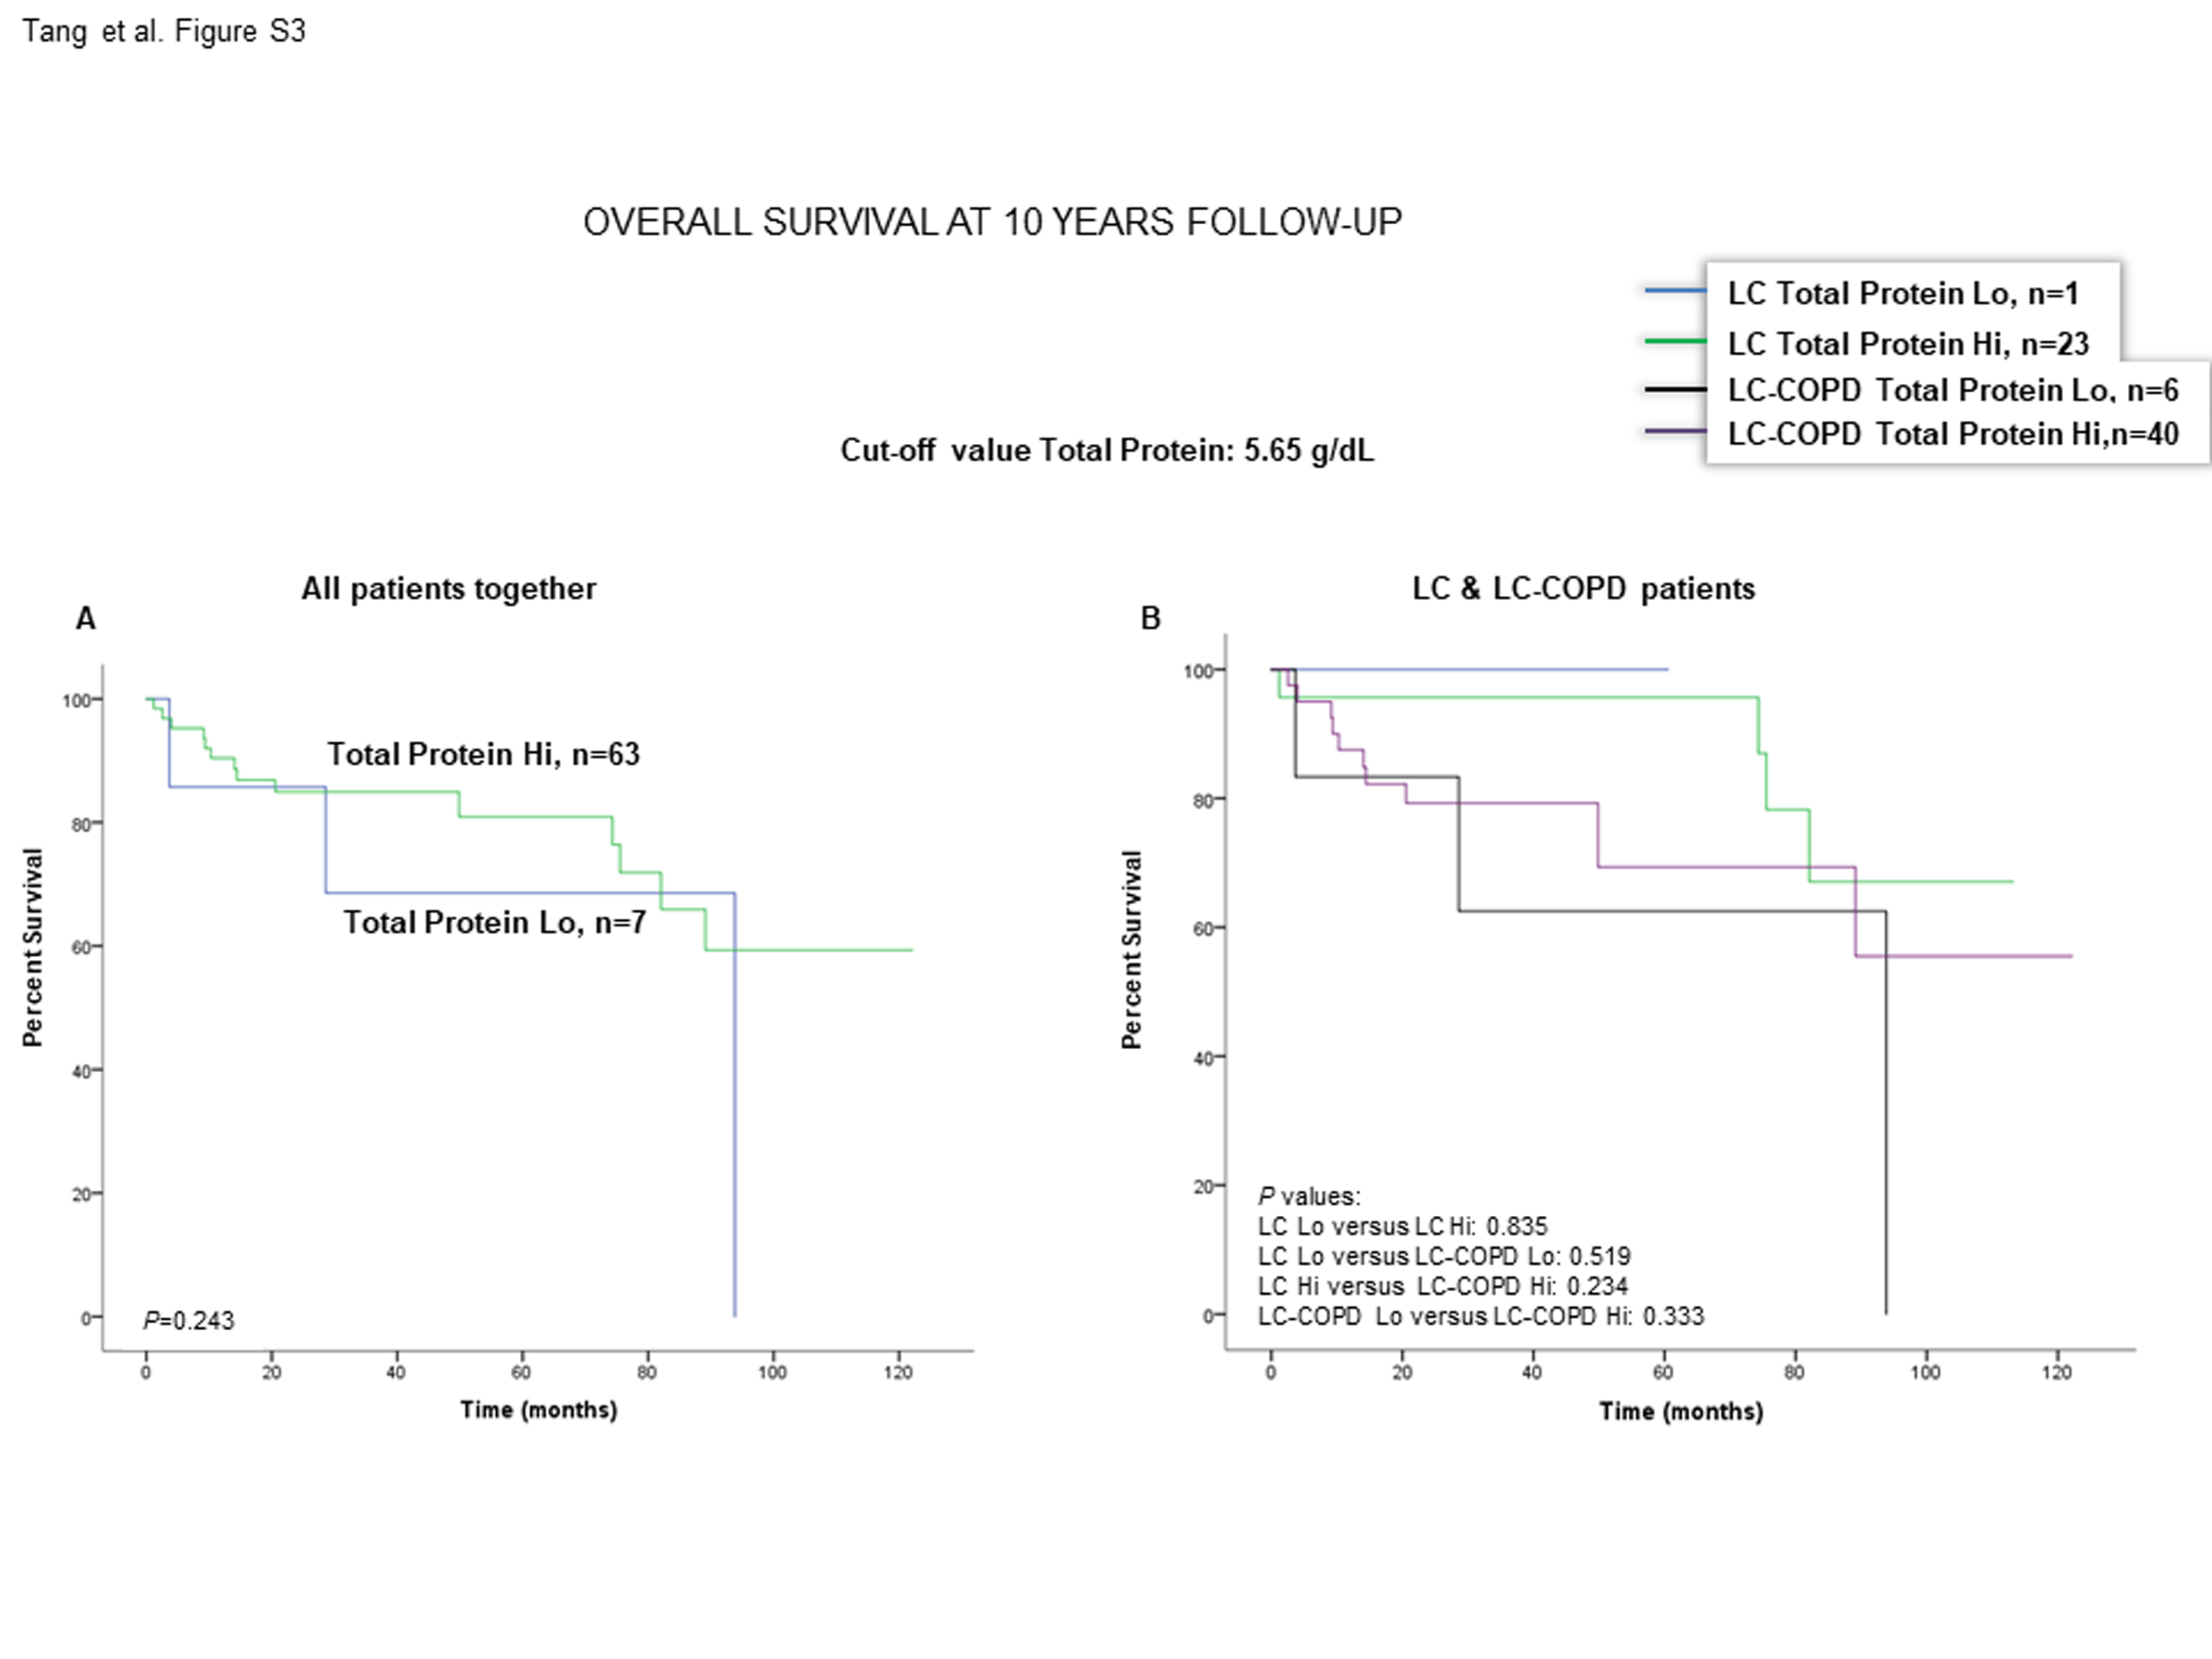

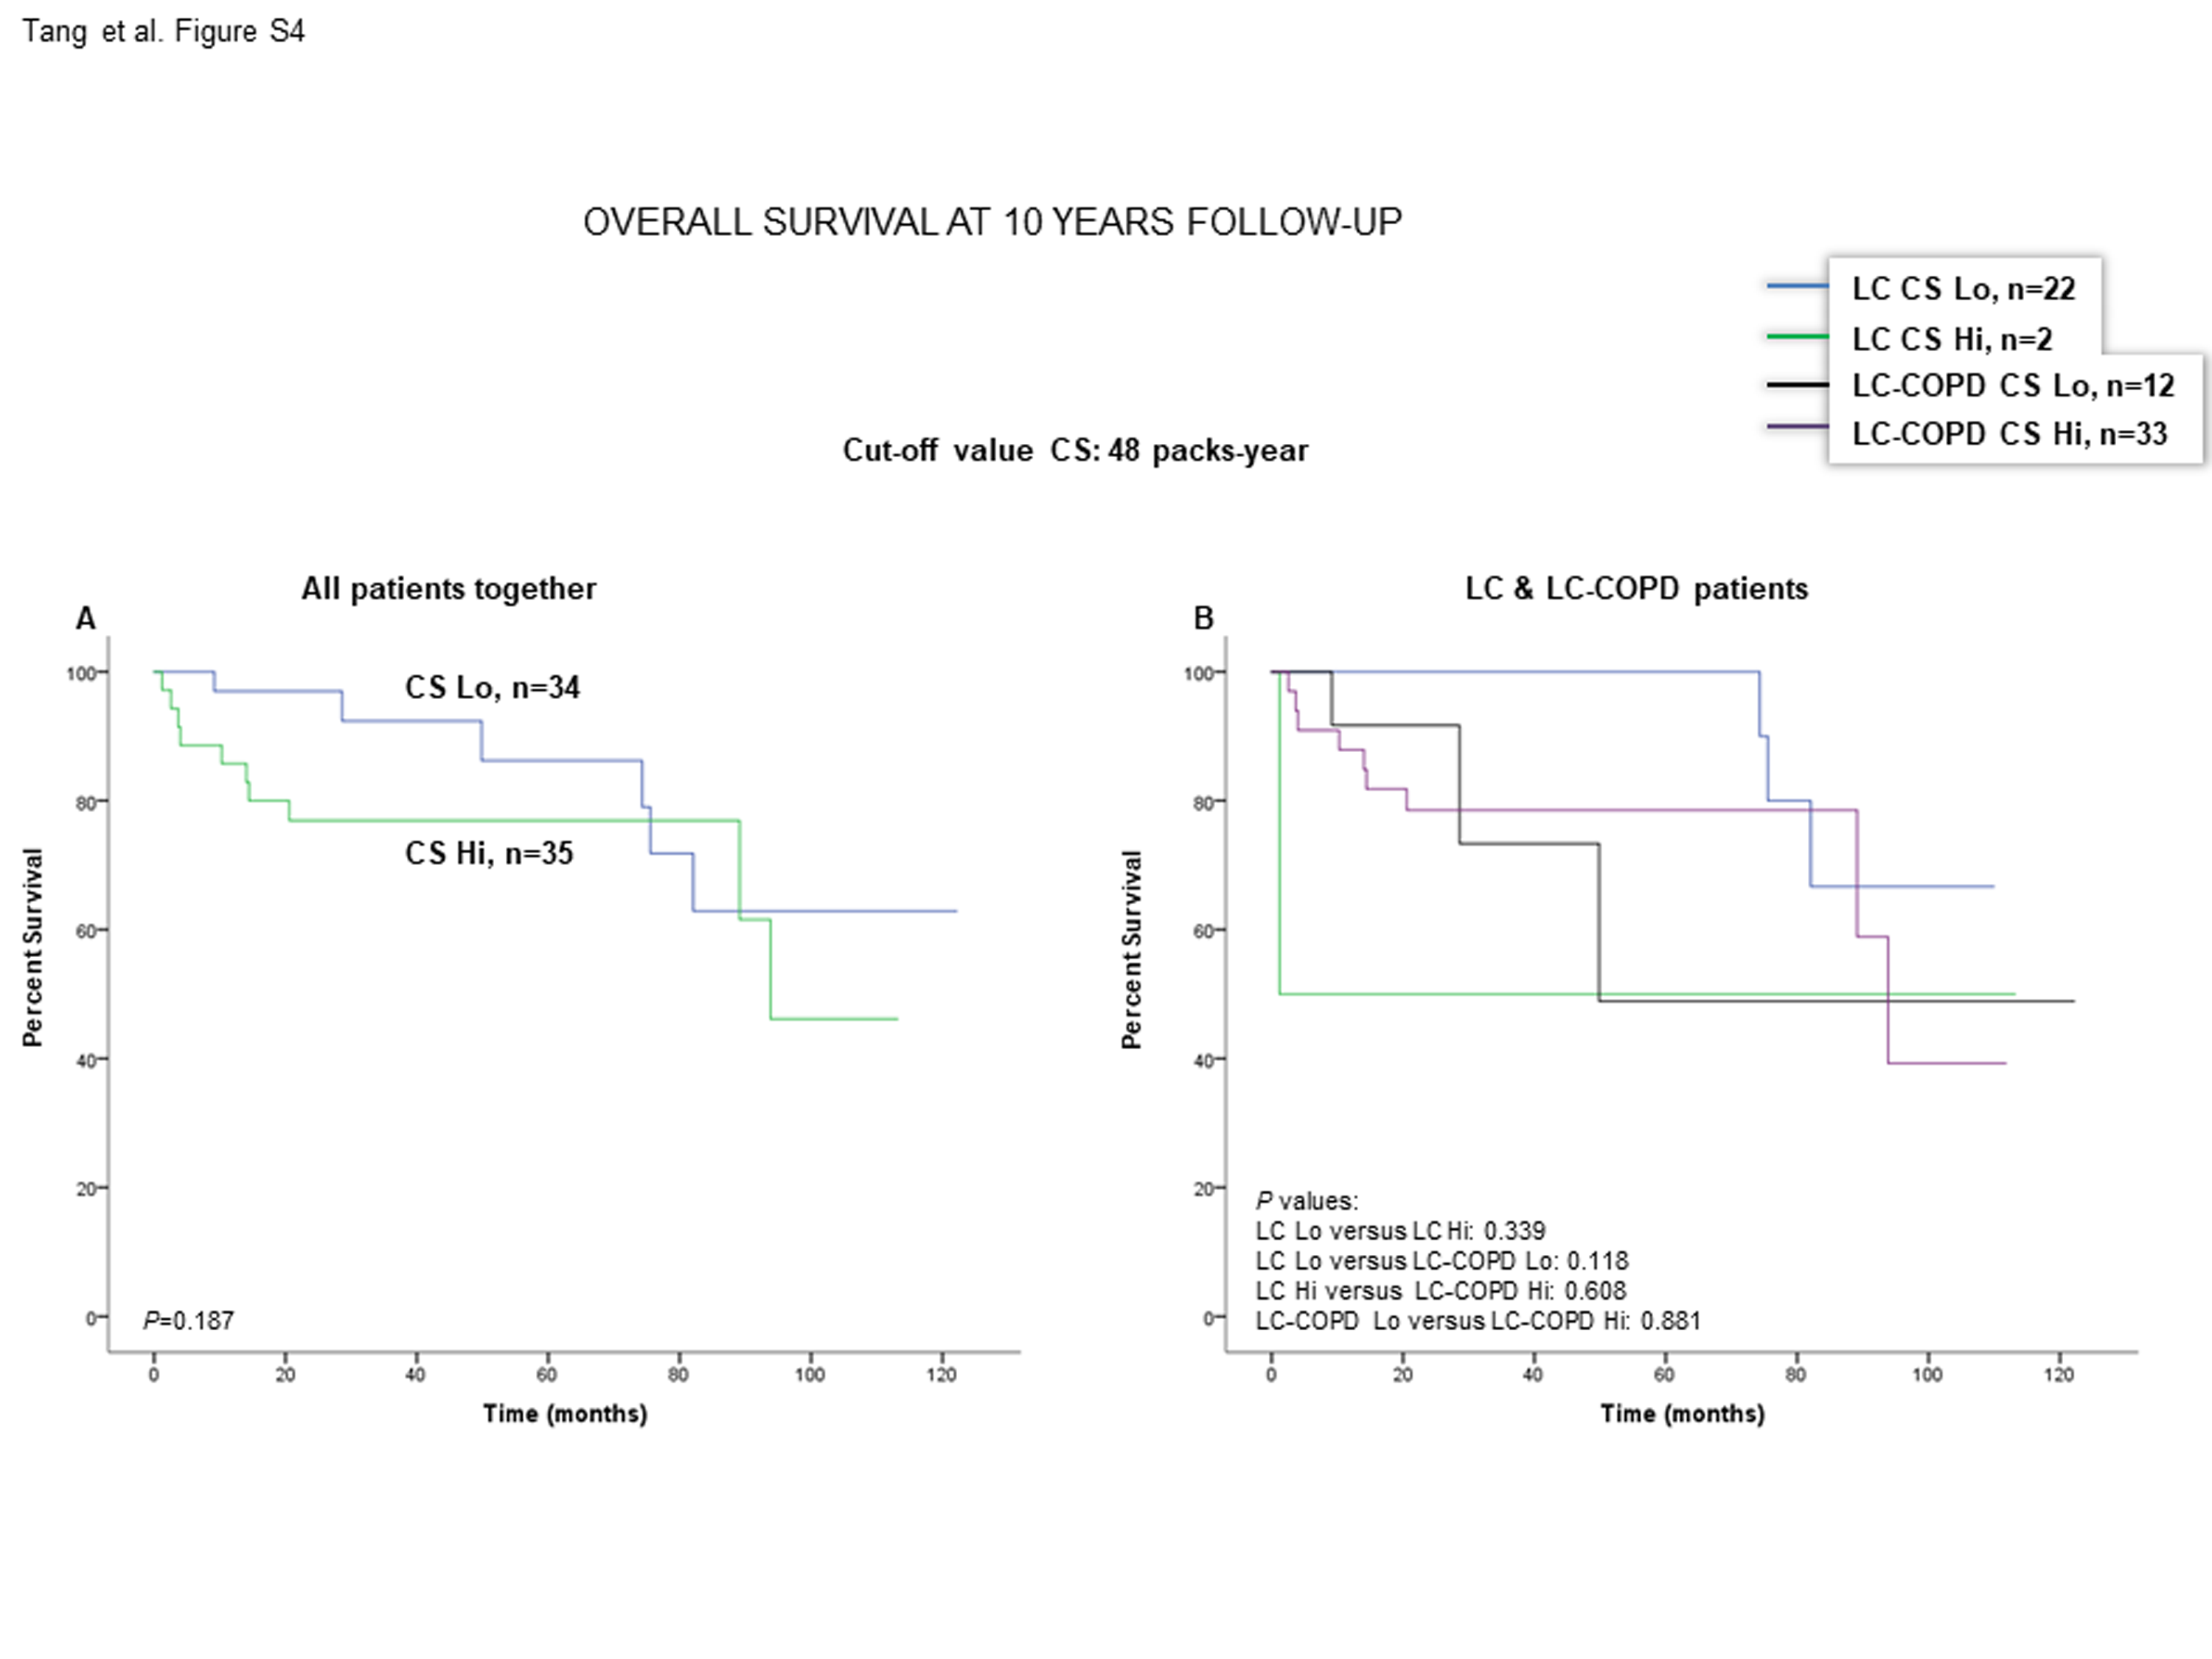

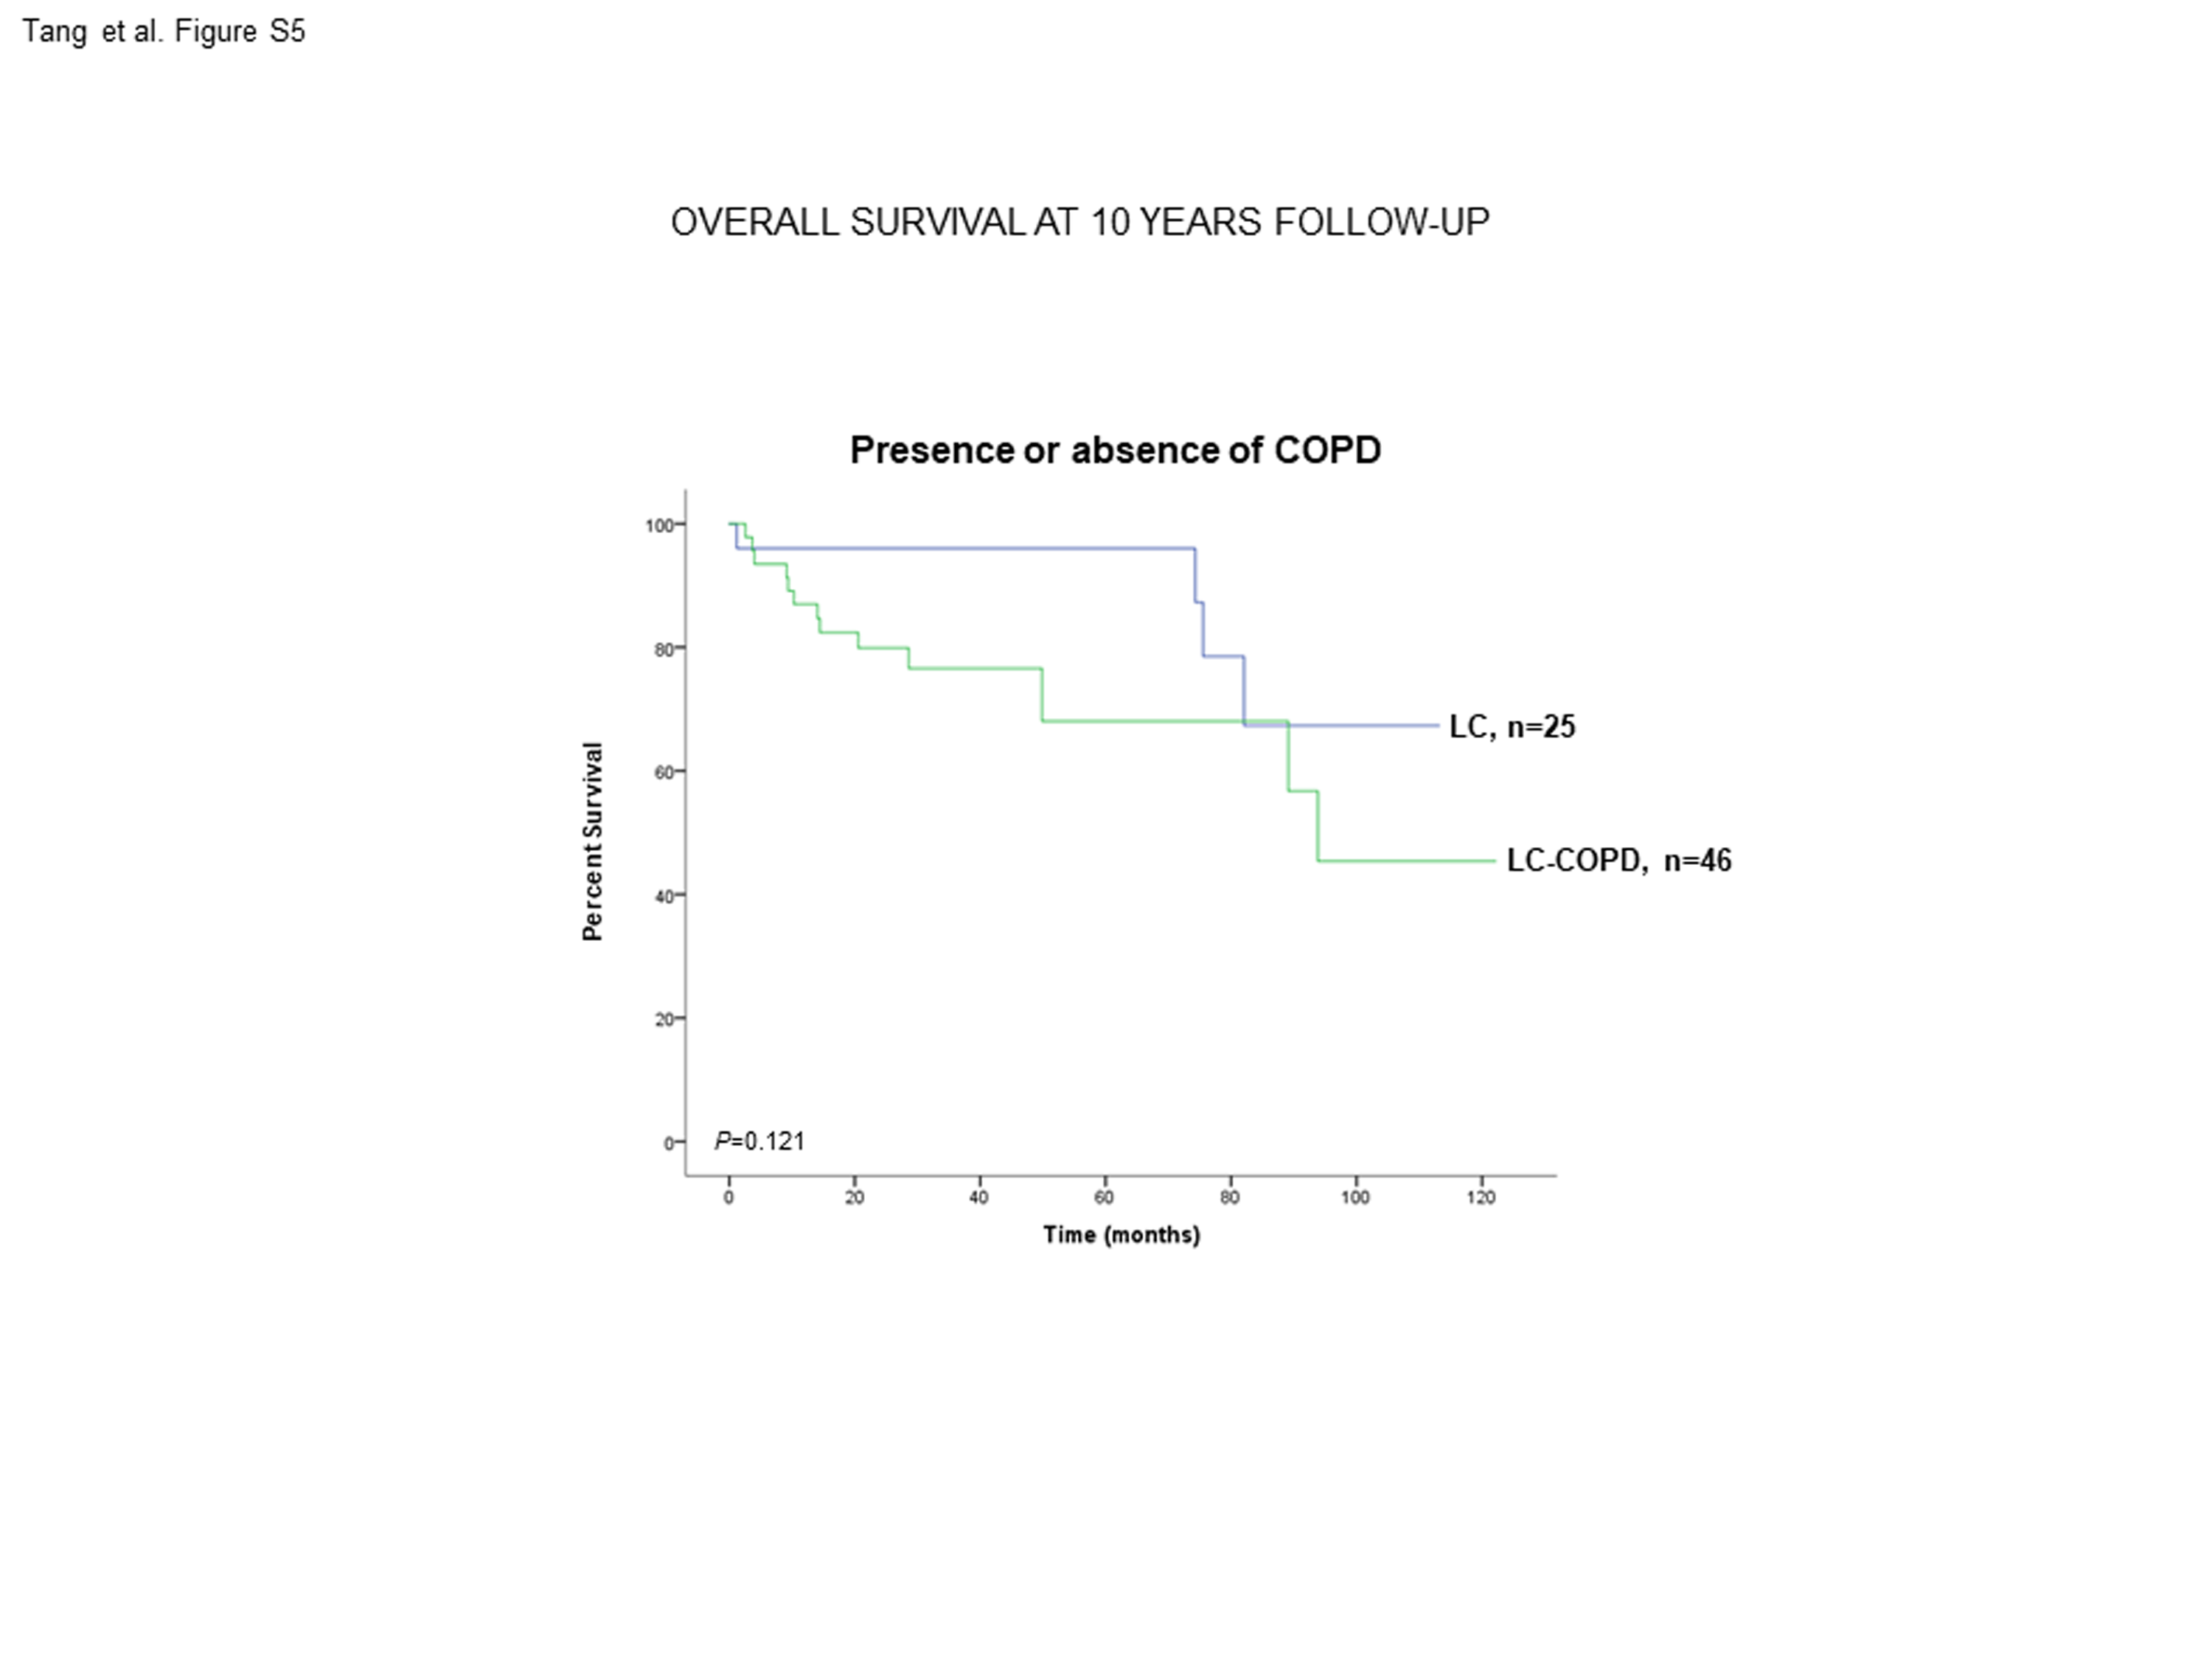

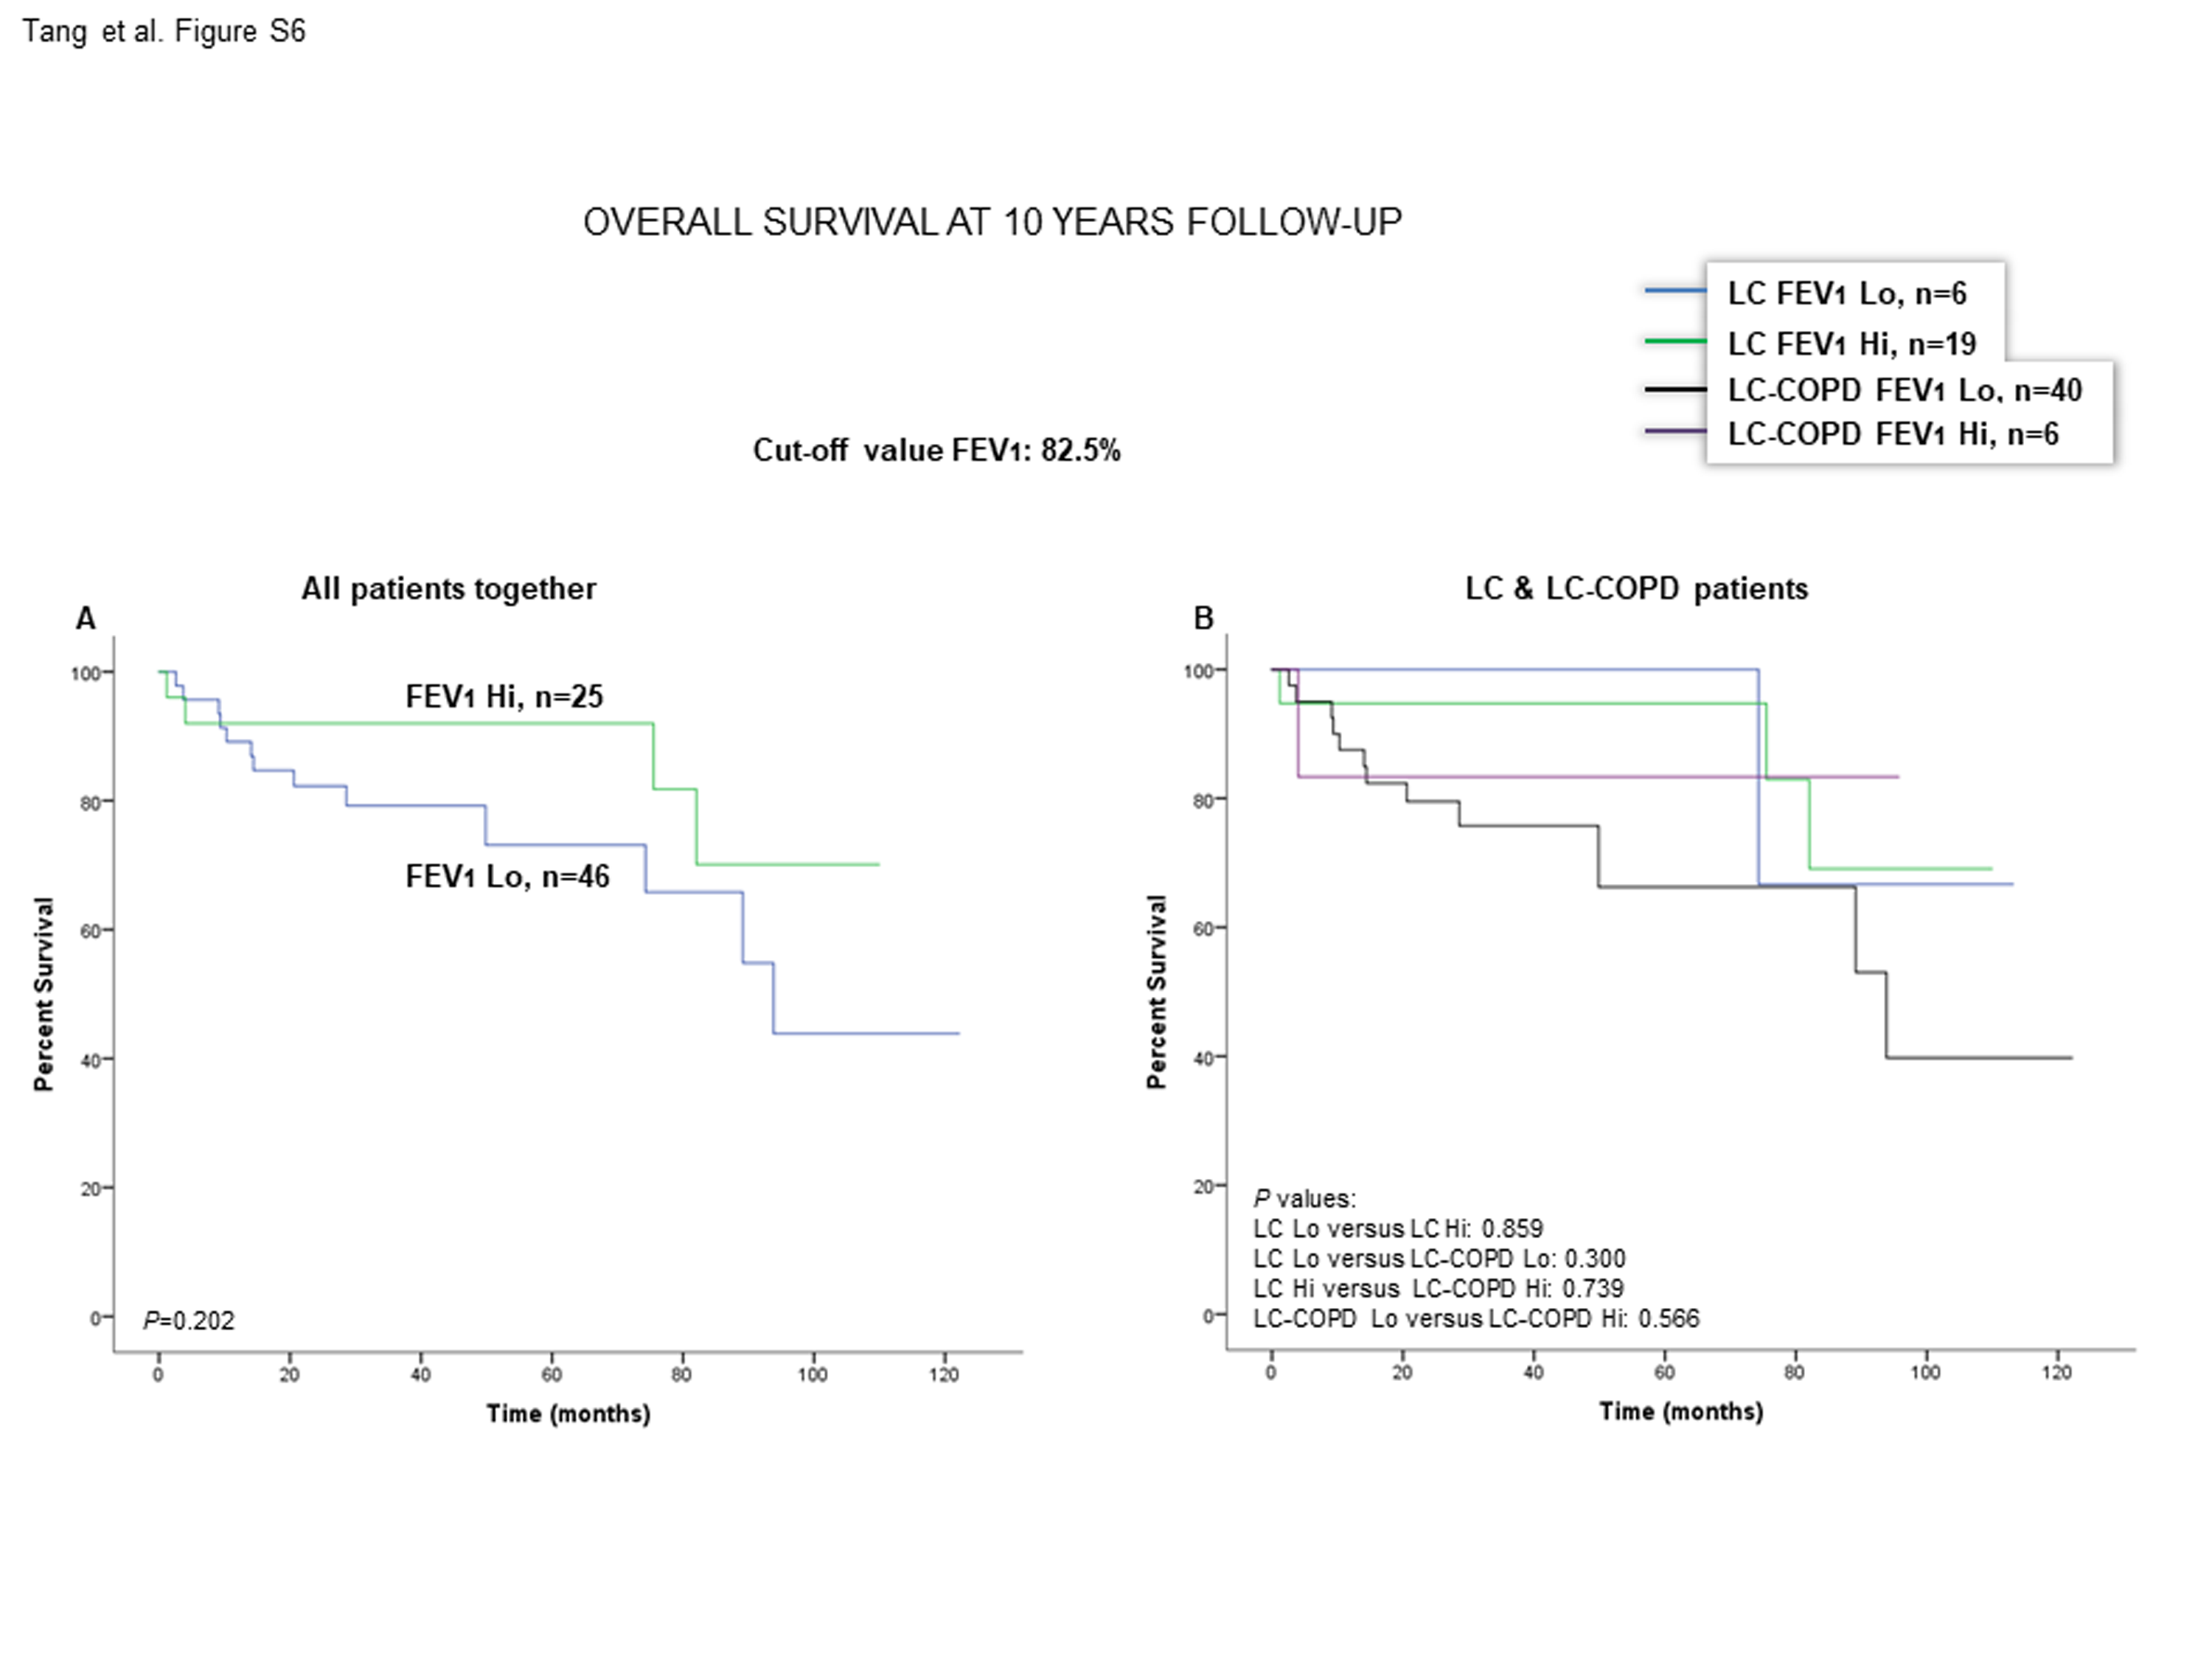

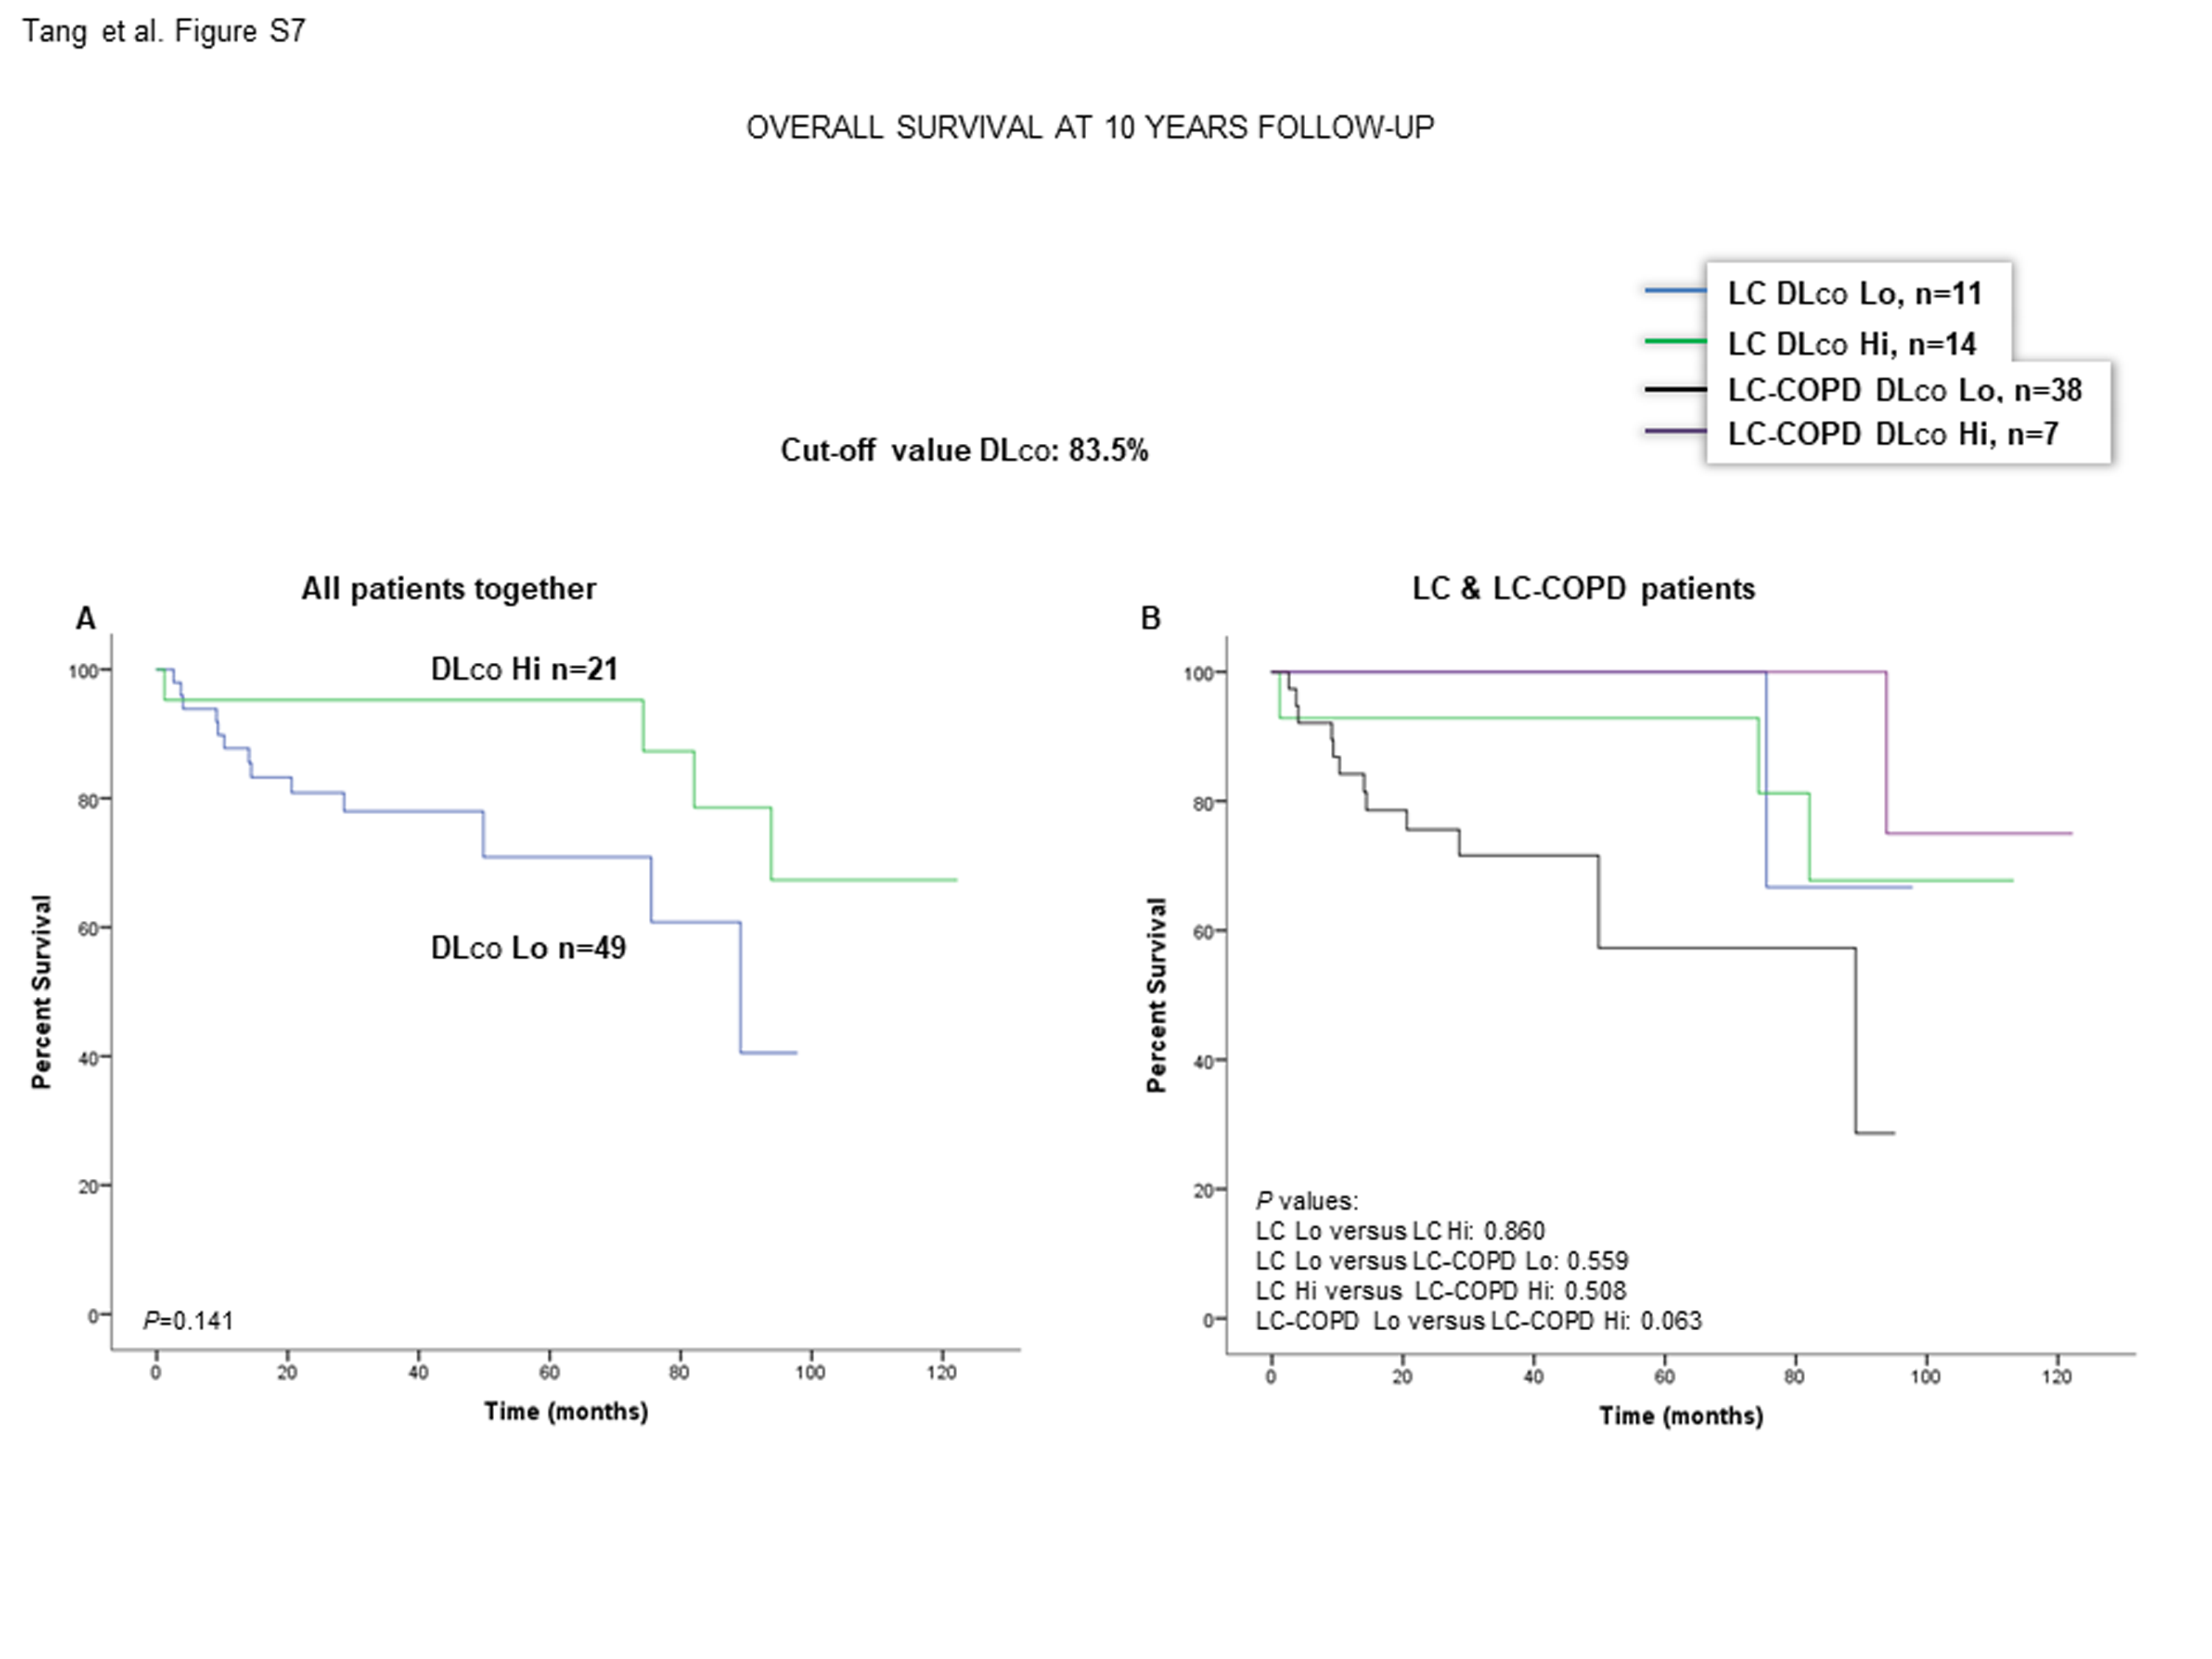

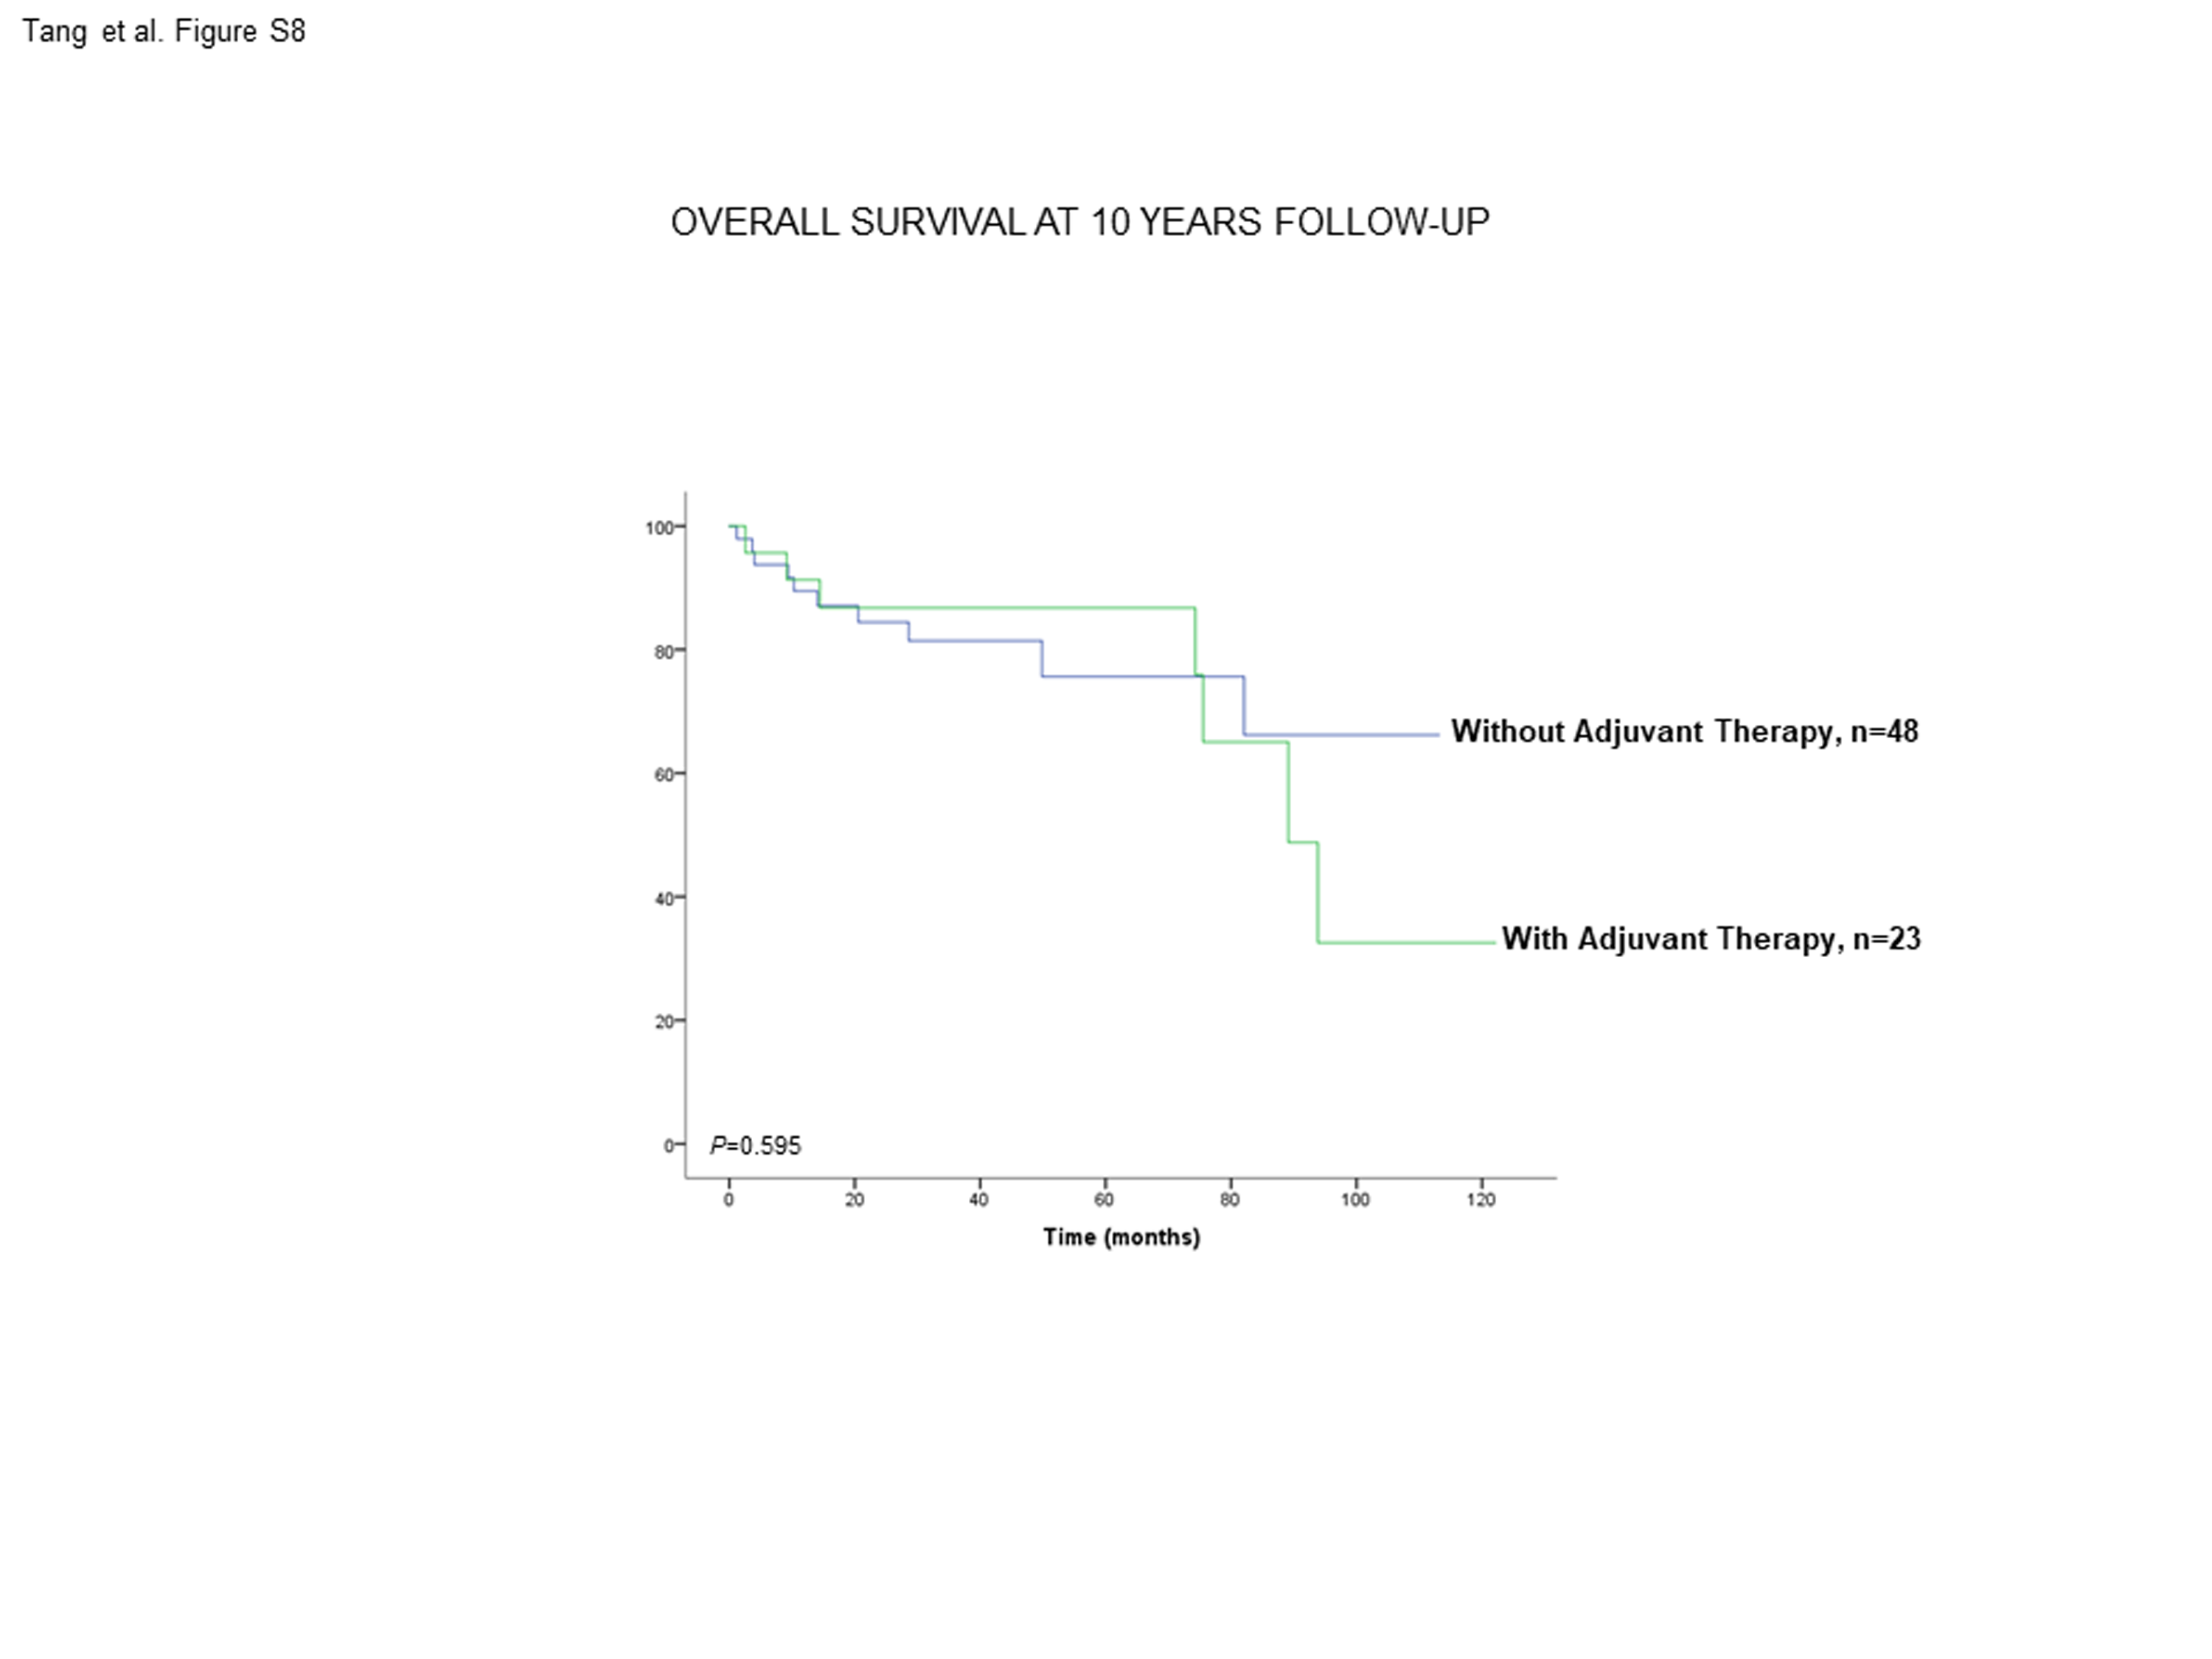


**LEGENDS TO FIGURES**

**Figure S1:** (A) Kaplan-Meier survival curves for OS in non-smokers (never-smokers + ex-smokers) of LC patients based on the cut-off value of the BMI (above and below the cut-off value:21.5 kg/m2). (B) Kaplan-Meier survival curves for OS in non-smokers (never-smokers + ex-smokers) of LC patients with and without COPD based on the cut-off value of the BMI (above and below the cut-off value:21.5 kg/m2). This information was not available in one patient. Definition of abbreviations: BMI, body mass index; LC, lung cancer; COPD, chronic obstructive pulmonary disease; Hi, high level (above cut-off value); Lo, low level (below cut-off value).

**Figure S2:** (A) Kaplan-Meier survival curves for OS in non-smokers (never-smokers + ex-smokers) of LC patients based on the cut-off value of the albumin level (above and below the cut-off value:3.55 g/dL) in blood. (B) Kaplan-Meier survival curves for OS in non-smokers (never-smokers + ex-smokers) of LC patients with and without COPD based on the cut-off value of the albumin level (above and below the cut-off value:3.55 g/dL) in blood. This information was not available in two patients. Definition of abbreviations: LC, lung cancer; COPD, chronic obstructive pulmonary disease; Hi, high level (above cut-off value); Lo, low level (below cut-off value).

**Figure S3:** (A) Kaplan-Meier survival curves for OS in non-smokers (never-smokers + ex-smokers) of LC patients based on the cut-off value of the total protein level (above and below the cut-off value:5.65 g/dL) in blood. (B) Kaplan-Meier survival curves for OS in non-smokers (never-smokers + ex-smokers) of LC patients with and without COPD based on the cut-off value of protein levels (above and below the cut-off value:5.65 g/dL) in blood. This information was not available in two patients. Definition of abbreviations: LC, lung cancer; COPD, chronic obstructive pulmonary disease; Hi, high level (above cut-off value); Lo, low level (below cut-off value).

**Figure S4:** (A) Kaplan-Meier survival curves for OS in non-smokers (never-smokers + ex-smokers) of LC patients based on the cut-off value of cigarette smoking burden (above and below the cut-off value:48 packs-year). (B) Kaplan-Meier survival curves for OS in non-smokers (never-smokers + ex-smokers) of LC patients with and without COPD based on the cut-off value of cigarette smoking burden (above and below the cut-off value:48 packs-year). This information was not available in three patients. Definition of abbreviations: LC, lung cancer; COPD, chronic obstructive pulmonary disease; CS, cigarette smoking; Hi, high level (above cut-off value); Lo, low level (below cut-off value).

**Figure S5:** Kaplan-Meier survival curves for OS in non-smokers (never-smokers + ex-smokers) of LC patients according to the presence of underlying COPD. This information was not available in one patient. Definition of abbreviations: LC, lung cancer; COPD, chronic obstructive pulmonary disease.

**Figure S6:** (A) Kaplan-Meier survival curves for OS in non-smokers (never-smokers + ex-smokers) based on the cut-off value of FEV1 (above and below the cut-off value:82.5%). (B) Kaplan-Meier survival curves for OS in non-smokers (never-smokers + ex-smokers) with and without COPD based on the cut-off value of FEV1 (above and below the cut-off value:82.5%). This information was not available in one patient. Definition of abbreviations: LC, lung cancer; COPD, chronic obstructive pulmonary disease; FEV1**,** forced expiratory volume in one second; Hi, high level (above cut-off value); Lo, low level (below cut-off value).

**Figure S7:** (A) Kaplan-Meier survival curves for OS in non-smokers (never-smokers + ex-smokers) of LC patients based on the cut-off value of DLCO (above and below the cut-off value:83.5%). (B) Kaplan-Meier survival curves for OS in non-smokers (never-smokers + ex-smokers) of LC patients with and without COPD based on the cut-off value of DLCO (above and below the cut-off value:83.5%). This information was not available in two patients. Definition of abbreviations: LC, lung cancer; COPD, chronic obstructive pulmonary disease; DLCO**,** transfer factor of the lung for carbon monoxide; Hi, high level (above cut-off value); Lo, low level (below cut-off value).

**Figure S8:** Kaplan-Meier survival curves for OS in non-smokers (never-smokers + ex-smokers) of LC patients based on the presence or absence of administration of adjuvant therapy to all patients together (LC and LC-COPD). This information was not available in one patient. Definition of abbreviations: LC, lung cancer; COPD, chronic obstructive pulmonary disease.
